# Supplementary material
Source: ML conference proceedings conference paper supplement (https://openaccess.thecvf.com/content/CVPR2025/html/Ding_RaSS_Improving_Denoising_CVPR_2025_paper.html)
Supplement: Supplementary file 1 [file Ding_RaSS_Improving_Denoising_CVPR_2025_supplemental.pdf]

# RaSS: Improving Denoising Diffusion Samplers with Reinforced Active Sampling Scheduler

## Supplementary Material

### 1. The Training Efficiency of RaSS

RaSS is highly efficient and surpasses existing methods that demand additional computational resources such as Progressive Distil [3], DDSS [4] and AutoDiffusion [2] in computational resource requirements. RaSS utilizes a very small model as the sampling scheduler, which significantly reduces the training resource requirements. Table. 1 demonstrates the superior efficiency of RaSS compared to AutoDiffusion, DDSS and PD. The computational resource required by Autodiffusion, DDSS and PD is approximately  $1.25\times$ ,  $3.98\times$  and  $377\times$  that of RaSS

| Approach           | Steps | Method Type             | Total cost<br>(GPU Days) |
|--------------------|-------|-------------------------|--------------------------|
| RaSS               | 5     | Training<br>Small model | 0.89                     |
| AutoDiffusion      | 5     | Genetic Search          | 1.125                    |
| DDSS               | 5     | Reparameterization      | 3.55                     |
| Progressive Distil | 4     | Distillation            | 359                      |
| Progressive Distil | 8     | Distillation            | 314                      |

Table 1. The Training Efficiency comparison of RaSS. We assessed the computational resource demand of RaSS, AutoDiffusion, PD, and DDSS using our reconstructed Improved-Diffusion codebase and ImageNet  $64 \times 64$  on a single V100 GPU.

### 2. Visualization Results of RASS Using DDIM as the Baseline Sampler at 15 Steps

We visualized RaSS results at 15 steps and were surprised to find that using only half the steps could achieve similar or even higher image quality compared to 25-step results, as shown in Fig. 1. This improvement is due to our careful selection of the state space  $\mathcal{S} = \{P, I, \tau\}$  during the data collection phase, which provided essential information for optimizing the sampling scheduler.

### 3. The visual comparison using RASS on LSUN-Bedroom.

We conducted experiments on the LSUN-Bedroom dataset using the DDPM model [1], and the visualized results (see Fig. 2) for  $\alpha = 1$  demonstrate that RaSS achieves higher generation quality with fewer steps compared to methods without RaSS.

### References

- [1] Jonathan Ho, Ajay Jain, and Pieter Abbeel. Denoising diffusion probabilistic models. *Advances in neural information processing systems*, 33:6840–6851, 2020. 1
- [2] Lijiang Li, Huixia Li, Xiawu Zheng, Jie Wu, Xuefeng Xiao, Rui Wang, Min Zheng, Xin Pan, Fei Chao, and Rongrong Ji. Autodiffusion: Training-free optimization of time steps and architectures for automated diffusion model acceleration. In *Proceedings of the IEEE/CVF International Conference on Computer Vision*, pages 7105–7114, 2023. 1
- [3] Chenlin Meng, Robin Rombach, Ruiqi Gao, Diederik Kingma, Stefano Ermon, Jonathan Ho, and Tim Salimans. On distillation of guided diffusion models. In *Proceedings of the IEEE/CVF Conference on Computer Vision and Pattern Recognition*, pages 14297–14306, 2023. 1
- [4] Daniel Watson, William Chan, Jonathan Ho, and Mohammad Norouzi. Learning fast samplers for diffusion models by differentiating through sample quality. In *International Conference on Learning Representations*, 2021. 1

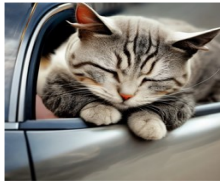

a cat is sleeping on the hood of a car

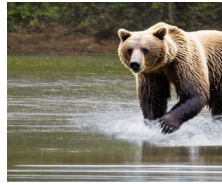

The bear standing in water is shaking it's fur.

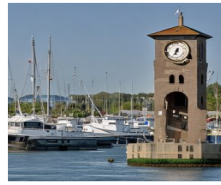

A tower with a clock situated in a harbor.

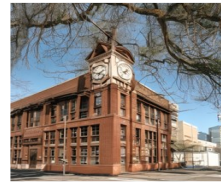

An old brown building has a clock on it.

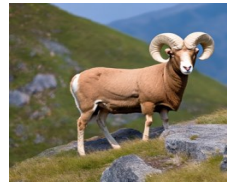

A ram stands on rocks on the hillside.

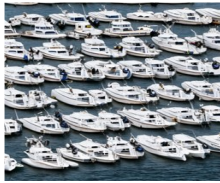

A marine filled with lots of white boats parked next to each other.

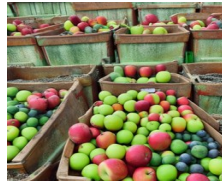

a lot of buckets of fruits including red and green apples

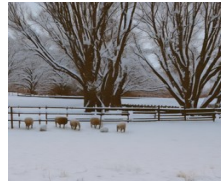

A group of sheep in snowy field with a fence and trees.

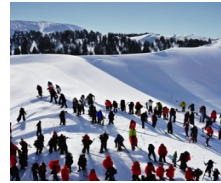

many young people wearing skis on a snowy slope

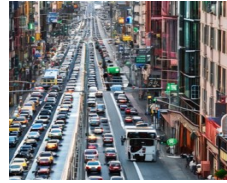

A city street filled with lots of traffic.

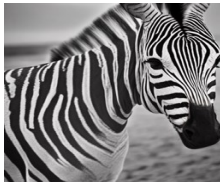

a close up of a zebra standing on dirt ground

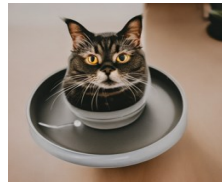

A cat is sitting in a small bowl on the table.

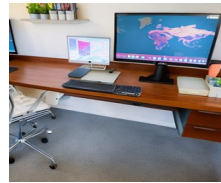

Two monitors sit on an organized desk area

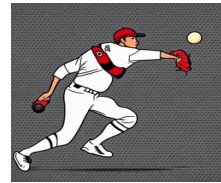

The baseball player has connected with the ball.

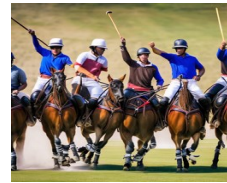

Two teams are riding horses while playing polo.

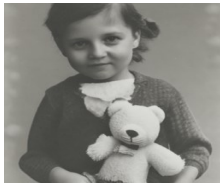

A black and white photograph of a little girl with a teddy bear.

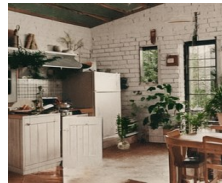

An old-fashioned picture filter features a kitchen with some plants.

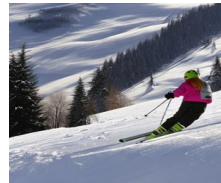

A woman on skis heading down the slope

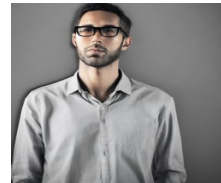

This man is wearing glasses in order to see better.

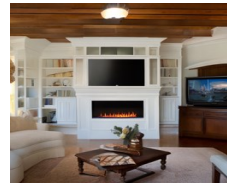

some white cabinets a fireplace a television set and a lamp

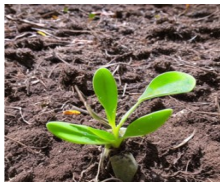

New plants are sprouting up from the forest floor.

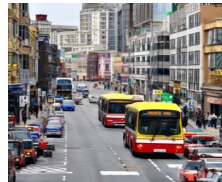

A busy city street with buses, trucks and cars.

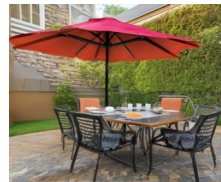

A table with chairs and an umbrella on a patio.

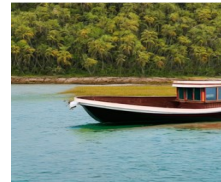

A boat sitting out on an island surrounded by water.

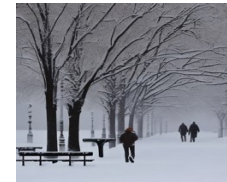

People walking through the snow past park benches.

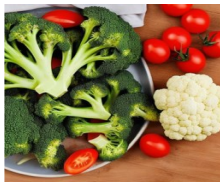

A plate of broccoli and cauliflower with a slice of tomato.

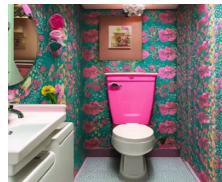

A pink toilet in a small flower patterned bathroom stall

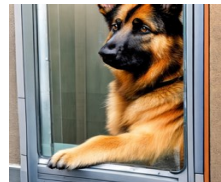

There's a German shepherd dog looking out a glass door

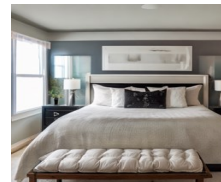

A bedroom with a large bed sitting next to a black dresser.

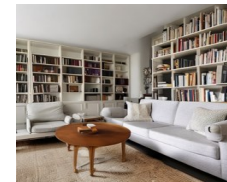

A living room with a bookcase, sofa and coffee table.

Figure 1. The visualization Results of RASS on MS-COCO.



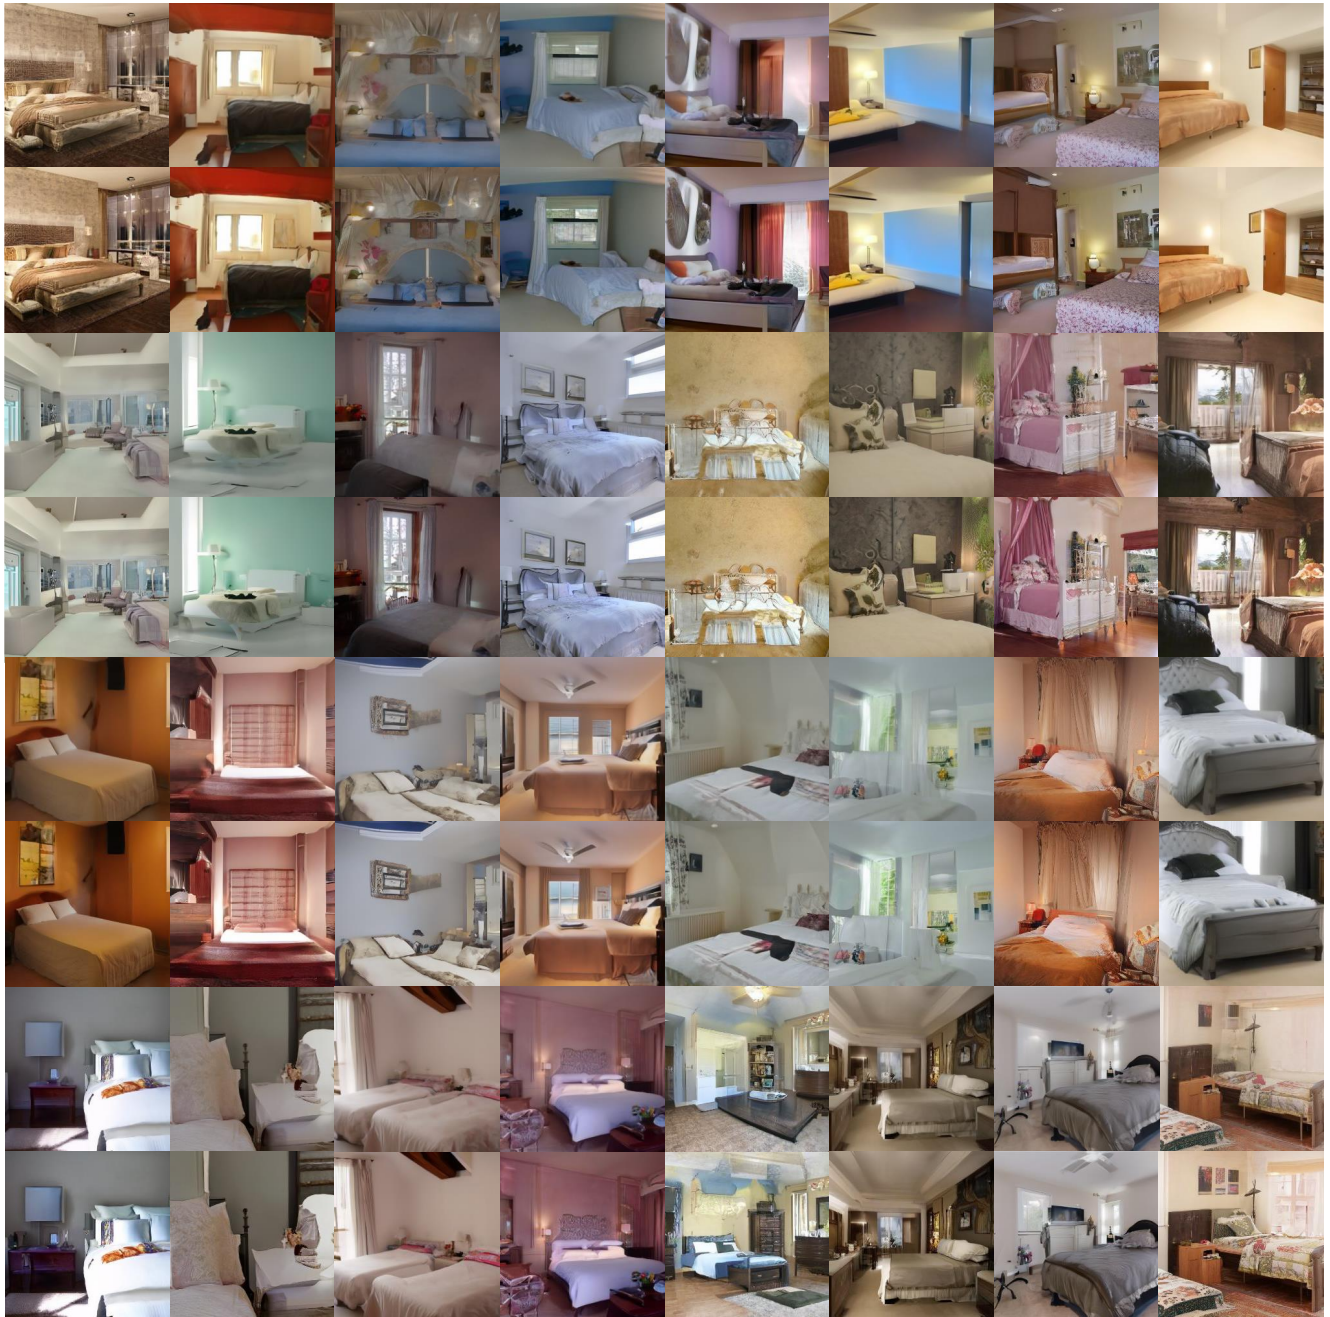

Figure 2. The visual comparison using RASS on LSUN-Bedroom. The above is DDIM, the following is DDIM+RASS
